# Supplementary material
Source: HighWire-hosted journal article supplement (https://gh.bmj.com/content/4/4/e001610)
Supplement: inline-supplementary-material-1 [file inline-supplementary-material-1.pdf]

## Questionnaire for the evaluation of the personal health record for asylum seekers

Your pseudonym:

|  |  |  |  |  |  |
|--|--|--|--|--|--|
|  |  |  |  |  |  |
|--|--|--|--|--|--|

Today's date:

|   |   |   |   |   |   |   |   |
|---|---|---|---|---|---|---|---|
| T | T | M | M | 2 | 0 | 1 | 6 |
|---|---|---|---|---|---|---|---|

| Specifications on the patient              |                                                                                                                                                                                                                                                                                                                                                                                                                                                                                                                                                                                                                                                                                                                                                                                                                                    |
|--------------------------------------------|------------------------------------------------------------------------------------------------------------------------------------------------------------------------------------------------------------------------------------------------------------------------------------------------------------------------------------------------------------------------------------------------------------------------------------------------------------------------------------------------------------------------------------------------------------------------------------------------------------------------------------------------------------------------------------------------------------------------------------------------------------------------------------------------------------------------------------|
| 1                                          | <b>Year of birth</b> <input type="text"/>                                                                                                                                                                                                                                                                                                                                                                                                                                                                                                                                                   |
| 2                                          | <b>Sex</b> <input type="checkbox"/> Female <input type="checkbox"/> Male                                                                                                                                                                                                                                                                                                                                                                                                                                                                                                                                                                                                                                                                                                                                                           |
| 3                                          | <b>Nationality</b> <input type="checkbox"/> Afghanistan <input type="checkbox"/> Gambia <input type="checkbox"/> Cameroon <input type="checkbox"/> Nigeria <input type="checkbox"/> Somalia<br><input type="checkbox"/> Albania <input type="checkbox"/> Iraq <input type="checkbox"/> Macedonia <input type="checkbox"/> Serbia <input type="checkbox"/> Syria<br><input type="checkbox"/> Eritrea <input type="checkbox"/> Iran <input type="checkbox"/> Others:                                                                                                                                                                                                                                                                                                                                                                 |
| 4                                          | <b>Does the patient suffer from one or several severe chronic diseases?</b> (i.e. a disease which may lead to a life-threatening situation, to a reduction of life-expectancy or to a permanent impairment of quality of life if it is not treated continuously)<br><br><input type="checkbox"/> Yes, one <input type="checkbox"/> Yes, several <input type="checkbox"/> No, none <input type="checkbox"/> Not known / not asked                                                                                                                                                                                                                                                                                                                                                                                                   |
| 5                                          | <b>Please judge the general condition of the patient:</b><br><br><input type="checkbox"/> Very good <input type="checkbox"/> Good <input type="checkbox"/> Moderate <input type="checkbox"/> Bad <input type="checkbox"/> Very bad                                                                                                                                                                                                                                                                                                                                                                                                                                                                                                                                                                                                 |
| 6                                          | <b>Does the patient take long-term medication?</b> <input type="checkbox"/> yes <input type="checkbox"/> no <input type="checkbox"/> Not known / not asked                                                                                                                                                                                                                                                                                                                                                                                                                                                                                                                                                                                                                                                                         |
| Specifications on the today's consultation |                                                                                                                                                                                                                                                                                                                                                                                                                                                                                                                                                                                                                                                                                                                                                                                                                                    |
| 7                                          | <b>How did you communicate with the patient during the today's consultation? (Several answers possible)</b><br><input type="checkbox"/> Via a common language<br><input type="checkbox"/> Translation by a professional interpreter<br><input type="checkbox"/> Translation by an unprofessional interpreter (laypersons)<br><input type="checkbox"/> Use of technical aids<br><input type="checkbox"/> Sign language / non-verbal communication                                                                                                                                                                                                                                                                                                                                                                                   |
| 8                                          | <b>Please judge the following statement: „During the consultation the necessary medical information could be gathered“</b><br><br><input type="checkbox"/> Fully correct <input type="checkbox"/> Correct <input type="checkbox"/> Partly correct <input type="checkbox"/> Not correct <input type="checkbox"/> Not at all correct                                                                                                                                                                                                                                                                                                                                                                                                                                                                                                 |
| Presence of the personal health record     |                                                                                                                                                                                                                                                                                                                                                                                                                                                                                                                                                                                                                                                                                                                                                                                                                                    |
| 9                                          | <b>Was a personal health record available during the today's consultation?</b> <input type="checkbox"/> Yes <input type="checkbox"/> No                                                                                                                                                                                                                                                                                                                                                                                                                                                                                                                                                                                                                                                                                            |
| Presence of written medical information    |                                                                                                                                                                                                                                                                                                                                                                                                                                                                                                                                                                                                                                                                                                                                                                                                                                    |
| 10                                         | <b>Was written medical information available during the today's consultation?</b> <input type="checkbox"/> Yes <input type="checkbox"/> No<br>↳ Go to question 13                                                                                                                                                                                                                                                                                                                                                                                                                                                                                                                                                                                                                                                                  |
| 11                                         | <b>To which medical aspects did the written information refer? (Several answers possible)</b><br><input type="checkbox"/> Previously known diseases/diagnoses <input type="checkbox"/> Treatment<br><input type="checkbox"/> Diagnostics / examinations <input type="checkbox"/> Medication<br><input type="checkbox"/> Others:                                                                                                                                                                                                                                                                                                                                                                                                                                                                                                    |
| 12                                         | <b>In which form was the written medical information available? (Several answers possible)</b><br><input type="checkbox"/> Specifications in the personal health record <input type="checkbox"/> Medical document from the patient's home country<br><input type="checkbox"/> Specifications in the electronic patient record <input type="checkbox"/> Blood results<br><input type="checkbox"/> Physician's letter of a practice <input type="checkbox"/> Loose papers<br><input type="checkbox"/> Physician's letter of an emergency department <input type="checkbox"/> Official vaccination document<br><input type="checkbox"/> Discharge report of a hospital after hospitalization <input type="checkbox"/> Medication list<br><input type="checkbox"/> Report of the public health office <input type="checkbox"/> Others: |
| 13                                         | <b>Was relevant written information lacking for the today's consultation</b> <input type="checkbox"/> No <input type="checkbox"/> Yes, namely:                                                                                                                                                                                                                                                                                                                                                                                                                                                                                                                                                                                                                                                                                     |
| Abschließende Beurteilung                  |                                                                                                                                                                                                                                                                                                                                                                                                                                                                                                                                                                                                                                                                                                                                                                                                                                    |
| 14                                         | <b>Overall: How do you judge the information situation for the today's consultation?</b><br><br><input type="checkbox"/> Sehr gut <input type="checkbox"/> Gut <input type="checkbox"/> Mittelmäßig <input type="checkbox"/> Schlecht <input type="checkbox"/> Sehr schlecht                                                                                                                                                                                                                                                                                                                                                                                                                                                                                                                                                       |
| 15                                         | <b>In case that the personal health record contained information, how helpful was this information?</b><br><br>Not at all helpful <input type="checkbox"/> 0 <input type="checkbox"/> 1 <input type="checkbox"/> 2 <input type="checkbox"/> 3 <input type="checkbox"/> 4 <input type="checkbox"/> 5 <input type="checkbox"/> 6 <input type="checkbox"/> 7 <input type="checkbox"/> 8 <input type="checkbox"/> 9 <input type="checkbox"/> 10 <input type="checkbox"/> Extremely helpful                                                                                                                                                                                                                                                                                                                                             |
